# Supplementary material
Source: PubMed Central journal article supplement (PMC3991014)
Supplement: NIHMS543120-supplement-01.pdf [file NIHMS543120-supplement-01.pdf]

Ms. Ref. No.: BBR-D-13-00710

Title: Interaction between serum BDNF and aerobic fitness predicts recognition memory in healthy young adults

Authors: Andrew Whiteman, B.A.; Daniel E Young, Sc.D.; Xuemei He, M.D.; Tai C Chen, Ph.D.; Robert C Wagenaar, Ph.D.; Chantal E Stern, D.Phil.; Karin Schon, Ph.D.

Behavioural Brain Research

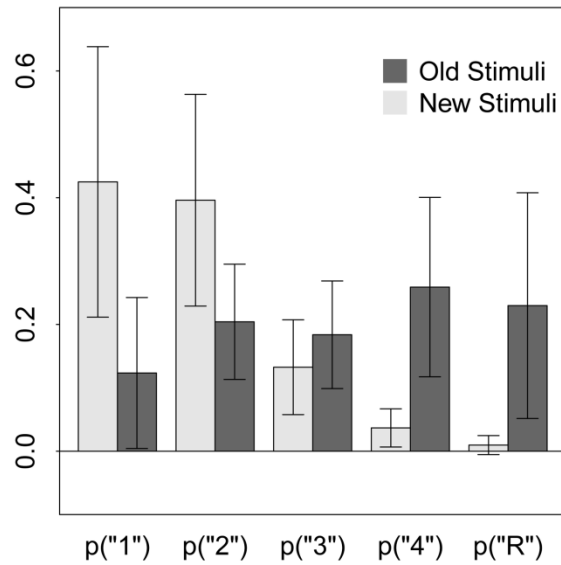

**Supplementary Figure 1.** Summary of mean proportions of [1-4, R] responses to both old and new SMT stimuli. Error bars indicate  $\pm$  one standard deviation.
